# Supplementary material
Source: MDPI journal article supplement (https://www.mdpi.com/2075-4701/9/8/909)
Supplement: s1 [file s1]

# Thermodynamic Analysis for the Magnetic-Field-Induced Precipitation Behaviours in Steels

Zihua Li, Tingping Hou \*, Guanghui Wu, Kaiming Wu \* and Hengfu Lin

The State Key Laboratory for Refractories and Metallurgy, Hubei Province Key Laboratory of Systems Science in Metallurgical Process, International Research Institute for Steel Technology, Wuhan University of Science and Technology, Wuhan 430081, China

\* Correspondence: [houtingping@wust.edu.cn](mailto:houtingping@wust.edu.cn) (T.H.); Tel.: +86-1814-052-2212; Fax: +86-27-68862606  
[wukaiming@wust.edu.cn](mailto:wukaiming@wust.edu.cn) (K.W.); Tel.: +86-1310-061-0041; Fax: +86-27-68862606

## Supplementary Note 1: Calculation of Diffraction Patterns

Diffraction patterns are formed by the interference of diffraction waves, which can be decomposed into structural factors ( $F_{(hkl)}$ ) and electron scattering factors  $f(s)$ . The expression of the atomic scattering factor is as follows:

$$f(s) = \sum_{i=1}^4 a_i \exp(-b_i s^2) + c \quad (S1)$$

where  $a_i$ ,  $b_i$  ( $i = 0, 1, 2, 3, 4$ ), and  $c$  are nine factors [1]. (Table S1) that can be obtained by consulting literature and  $s = \sin\theta/\lambda$ .

The structural factors can be expressed as follows:

$$F_{(hkl)} = \sum_{j=1}^N f_i(s) \exp[2\pi i(hx_j + ky_j + lz_j)] \quad (S2)$$

where  $N$  is the number of atoms in the unit cell,  $f_i(s)$  is the atomic scattering factor of the  $i$ th atom at  $(x_i, y_i, z_i)$  in the unit cell.  $h, k, l$  are the indices of the lattice planes.

**Table S1.** Parameters of C, Cr and Fe in the atomic scattering factor analytical formula.

| Atom | $a_1$   | $b_1$   | $a_2$   | $b_2$   | $a_3$   | $b_3$   | $a_4$   | $b_4$   | $c$     |
|------|---------|---------|---------|---------|---------|---------|---------|---------|---------|
| C    | 0.23238 | 1.01435 | 0.81994 | 5.78949 | 1.12081 | 19.2115 | 0.30422 | 54.1132 | 0.03179 |
| Cr   | 0.88038 | 1.07250 | 2.09996 | 5.53692 | 2.20830 | 26.8071 | 1.65155 | 98.1169 | 0.12471 |
| Fe   | 0.90628 | 1.01383 | 1.92631 | 4.97780 | 2.41077 | 24.2683 | 1.79055 | 79.4409 | 0.12842 |

The positions of atoms in the cell are used as an input file, and the zone axis is entered. The program will eventually obtain a diffraction pattern by reading the atomic coordinates and calculations, which considers the law of extinction.

## Supplementary Note 2: Weiss Molecular Field Theory [2]

The magnetization of carbides can be expressed by Equation (S3):

$$M(T, B) = Nm(0, 0) B_J(\alpha) \quad (S3)$$

where  $M(T, B)$  is the magnetization,  $T$  is the absolute temperature,  $B$  is the external magnetic field,  $N$  is the number of atoms per unit volume and  $m(0, 0)$  is the magnetic moment at 0 K without the magnetic field (0 T).  $B_J(\alpha)$  is the Brillouin function, which is defined as Equations (S4) and (S5),

$$B_J(\alpha) = \frac{2J+1}{2J} \coth\left(\frac{2J+1}{2J}\alpha\right) - \frac{1}{2J} \coth\left(\frac{\alpha}{2J}\right) \quad (S4)$$

$$\alpha = \frac{nB \mu_B B}{k_B T} \quad (S5)$$

where  $J$  is the quantum number,  $n_B$  is the effective Bohr magneton number,  $\mu_B$  is the Bohr magneton and  $k_B$  is the Boltzmann constant.

### Supplementary Note 3: Thermodynamic Properties

The  $C_m$  is defined by Equations (S6) and (S7):

$$C_m(T, B) = k_f \frac{T}{T_c(B)} \exp \left[ -4 \left( 1 - \frac{T}{T_c(B)} \right) \right] \quad (T < T_C) \quad (S6)$$

$$C_m(T, B) = k_p \frac{T}{T_c(B)} \exp \left[ 8p \left( 1 - \frac{T}{T_c(B)} \right) \right] \quad (T > T_C) \quad (S7)$$

where  $p = 2$  for all carbides in the present work. The factors  $k_f$  and  $k_p$  are obtained by Equations (S8) and (S9):

$$k_f = \frac{4(1 - f_s)}{1 - \exp(-4)} S_{mag} \quad (S8)$$

$$k_p = 8pf_s S_{mag} \quad (S9)$$

$$S_{mag} = R \ln(m(T, B) + 1) \quad (S10)$$

where  $f_s$  is 0.105 and  $p$  is two for the alloy carbides studied in this paper.  $S_{mag}$  is the magnetic entropy, which can be obtained from Equation (S10).  $R$  is the universal gas constant, and  $m(T, B)$  is the magnetic moment dependent on temperature  $T$  and magnetic field strength  $B$ .

Based on the obtained heat capacity formula, the magnetic-field-induced magnetic entropy change ( $\Delta S_m$ ) and magnetic-field-induced magnetic enthalpy change ( $\Delta H_m$ ) can be obtained by a simple mathematical integration of the magnetic capacity, as shown in Equations (S11) and (S12).

$$\Delta S_m(T, B) = \int_0^T \frac{C_m(T, B)}{T} dT \quad (S11)$$

$$\Delta H_m(T, B) = \int_0^T C_m(T, B) dT \quad (S12)$$

### References

1. Jiang, J.S.; Li, F.H. Fitting the atomic scattering factors for electrons to an analytical formula. *Acta Phys. Sin.* **1984**, *33*, 845–849. (In Chinese)
2. Weiss, P. L'hypothèse du champ moléculaire et la propriété ferromagnétique. *J. Phys. Théor. Appl.* **1907**, *6*, 661–690.
